# Supplementary material for: Combination of Cetuximab and Oncolytic Virus Canerpaturev Synergistically Inhibits Human Colorectal Cancer Growth
Source: PubMed Central journal article supplement — Mol Ther Oncolytics. 2019 May 13;13:107–15. doi: 10.1016/j.omto.2019.04.004 (PMC6539424; doi:10.1016/j.omto.2019.04.004), 2019-05-13
Supplement: mmc1.pdf [file mmc1.pdf]

## **Supplemental Information**

### **Combination of Cetuximab and Oncolytic Virus Canerpaturev Synergistically Inhibits Human Colorectal Cancer Growth**

**Zhiwen Wu, Toru Ichinose, Yoshinori Naoe, Shigeru Matsumura, Itzel Bustos Villalobos, Ibrahim Ragab Eissa, Suguru Yamada, Noriyuki Miyajima, Daishi Morimoto, Nobuaki Mukoyama, Yoko Nishikawa, Yusuke Koide, Yasuhiro Kodera, Maki Tanaka, and Hideki Kasuya**

Figure S1

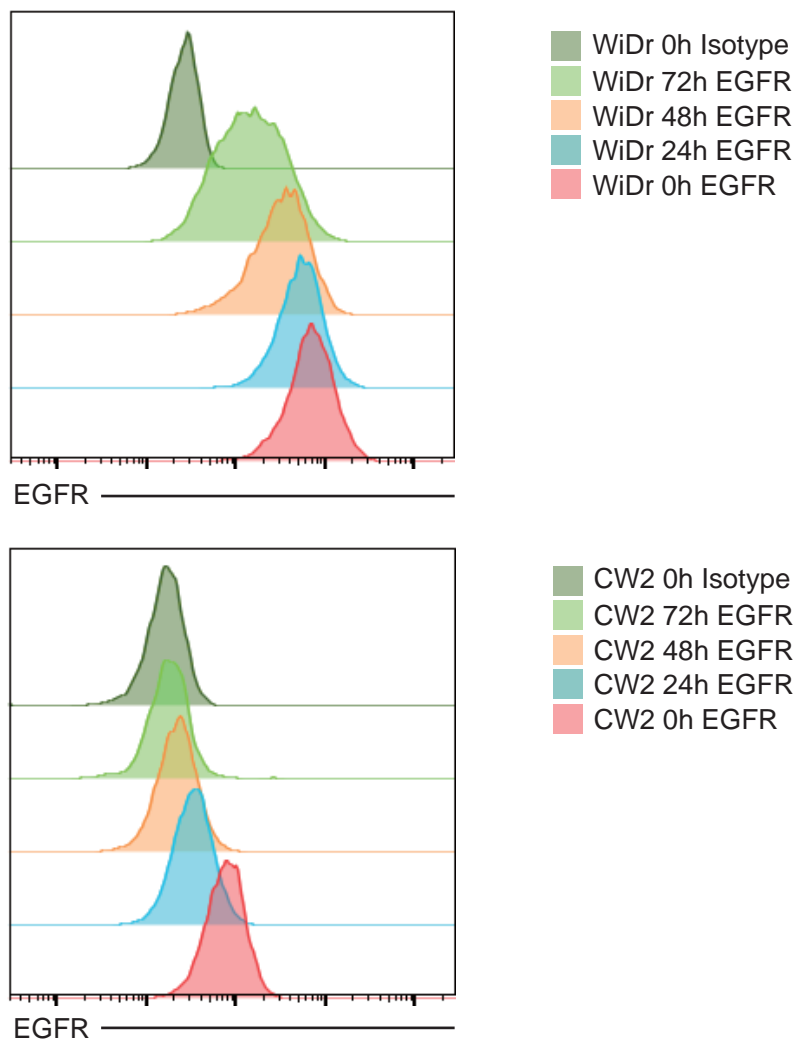

Figure S2

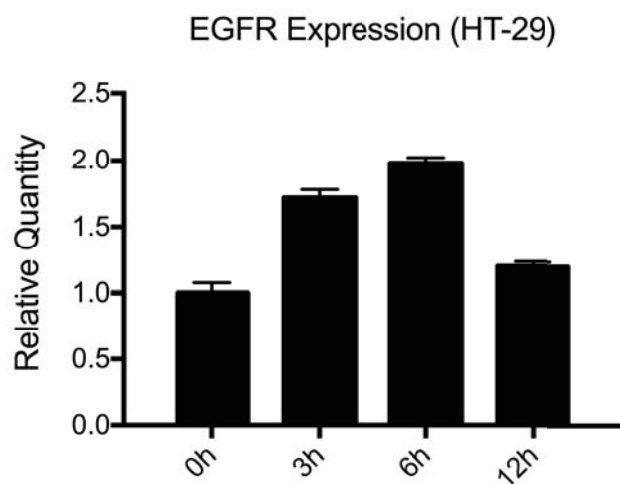

Figure S1. Evaluation of EGFR Expression After C-REV Infection. EGFR expression in WiDr and CW2 cells was determined by flow cytometry after C-REV infection.

Figure S2. Determination of EGFR mRNA levels After C-REV Infection. EGFR mRNA levels in HT-29 cells was detected by RT-PCR after C-REV infection.
